# Supplementary material for: A Taxonomic Review of Clostridium difficile Phages and Proposal of a Novel Genus, “Phimmp04likevirus”
Source: PubMed Central journal article supplement (PMC4452919; doi:10.3390/v7052534), 2015-05-21
Supplement: viruses-07-02534-s001.pdf [file viruses-07-02534-s001.pdf]

## Supplementary Materials

**Table S1.** *C. difficile* phages and accession numbers.

| Phage     | Accession number | ORF sequences in Genbank |
|-----------|------------------|--------------------------|
| φC2       | NC_009231.1      | 85                       |
| ΦCD119    | NC_007917.1      | 79                       |
| phiCDHM1  | HG531805         | 84                       |
| phiCDHM19 | LK985322         | 88                       |
| φCD27     | NC_011398.1      | 75                       |
| ΦMMP02    | NC_019421.1      | 76                       |
| phiCDHM14 | LK985321         | 50                       |
| phiCDHM11 | HG798901         | 47                       |
| phiCDHM13 | HG796225         | 50                       |
| ΦMMP04    | NC_019422.1      | 51                       |
| φCD38-2   | NC_015568.1      | 55                       |
| phiCD6356 | NC_015262.1      | 59                       |

**Table S2.** Protein Clusters with phage representatives.

|    | phiC<br>D6356 | φCD3<br>8-2 | ΦMM<br>P04 | phiCDH<br>M13 | phiCDH<br>M11 | phiCDH<br>M14 | φ<br>C2 | phiCDH<br>M1 | ΦCD<br>119 | phiCDH<br>M19 | φCD<br>27 | ΦMM<br>P02 |
|----|---------------|-------------|------------|---------------|---------------|---------------|---------|--------------|------------|---------------|-----------|------------|
| 0  | 1             |             |            |               |               |               |         |              |            |               |           |            |
| 1  |               | 1           |            |               |               |               |         |              |            |               |           |            |
| 2  |               |             |            |               |               |               |         |              |            |               | 1         |            |
| 3  |               |             |            |               |               |               |         |              |            |               |           | 1          |
| 4  |               |             |            |               |               |               |         |              | 1          |               |           |            |
| 5  |               | 1           |            |               |               |               |         |              |            |               |           |            |
| 6  |               |             |            |               |               |               |         |              |            | 1             |           |            |
| 7  |               |             |            |               |               |               | 1       | 1            |            |               |           |            |
| 8  |               |             |            |               |               |               |         |              |            | 1             |           |            |
| 9  |               | 1           | 1          | 1             |               |               |         |              |            |               |           |            |
| 10 |               |             |            |               |               |               |         | 1            |            |               |           |            |
| 11 |               |             |            |               |               |               | 1       | 1            |            |               |           |            |
| 12 |               | 1           |            |               |               |               |         |              |            |               |           |            |
| 13 |               |             | 1          | 1             | 1             | 1             |         |              |            |               |           |            |
| 14 |               | 1           |            |               |               |               |         |              |            |               |           |            |
| 15 |               |             |            |               |               |               |         |              |            |               | 1         |            |
| 16 |               |             |            |               |               |               |         | 1            |            |               |           |            |
| 17 |               |             |            |               |               |               |         |              |            | 1             |           | 1          |
| 18 |               |             | 1          | 1             | 1             | 1             |         |              |            |               |           |            |
| 19 | 1             |             |            |               |               |               |         |              |            |               |           |            |
| 20 |               |             |            |               |               |               | 1       |              |            | 1             | 1         |            |
| 21 |               |             |            |               |               |               |         | 1            |            |               |           |            |
| 22 |               |             | 1          | 1             | 1             | 1             |         |              |            | 1             |           |            |
| 23 |               |             |            |               |               |               |         |              |            |               | 1         | 1          |
| 24 |               |             |            |               |               |               |         | 1            |            |               |           |            |
| 25 |               |             |            |               |               |               | 1       | 1            |            |               |           |            |

Table S2. *Cont.*

|    | phiC<br>D6356 | φCD3<br>8-2 | ΦMM<br>P04 | phiCDH<br>M13 | phiCDH<br>M11 | phiCDH<br>M14 | φ<br>C2 | phiCDH<br>M1 | ΦCD<br>119 | phiCDH<br>M19 | φCD<br>27 | ΦMM<br>P02 |
|----|---------------|-------------|------------|---------------|---------------|---------------|---------|--------------|------------|---------------|-----------|------------|
| 26 |               |             |            |               |               |               |         |              |            |               | 1         | 1          |
| 27 |               | 1           |            |               |               |               |         |              |            |               |           |            |
| 28 |               |             |            |               |               |               |         |              |            |               | 1         | 1          |
| 29 |               |             |            |               |               |               | 1       |              |            |               |           |            |
| 30 |               |             |            |               | 1             | 1             |         |              |            |               |           |            |
| 31 |               |             |            |               |               |               |         | 1            |            |               |           |            |
| 32 |               |             |            |               |               |               |         |              |            |               | 1         |            |
| 33 |               |             |            |               |               |               |         |              | 1          | 1             |           |            |
| 34 |               |             |            |               |               |               |         |              |            |               | 1         | 1          |
| 35 |               | 1           |            |               |               |               |         |              |            |               |           |            |
| 36 |               |             |            |               |               |               | 1       | 1            |            |               |           |            |
| 37 |               |             |            | 1             | 1             | 1             |         |              | 1          |               |           |            |
| 38 |               |             | 1          | 1             | 1             | 1             |         |              |            |               |           |            |
| 39 |               |             | 1          |               |               |               |         |              |            |               |           |            |
| 40 |               |             |            |               |               |               | 1       | 1            |            |               |           |            |
| 41 |               | 1           |            |               |               |               |         |              |            |               |           |            |
| 42 |               |             |            |               |               |               |         |              |            |               | 1         |            |
| 43 |               |             |            |               |               |               | 1       |              |            |               |           |            |
| 44 | 1             |             |            |               |               |               |         |              |            |               |           |            |
| 45 | 1             |             |            |               |               |               |         |              |            |               |           |            |
| 46 |               |             |            |               |               |               |         |              |            |               | 1         |            |
| 47 |               |             | 1          | 1             | 1             | 1             |         |              |            |               |           |            |
| 48 |               |             |            |               |               |               |         | 1            | 1          | 1             |           |            |
| 49 | 1             |             |            |               |               |               |         |              |            |               | 1         | 1          |
| 50 | 1             |             |            |               |               |               |         |              |            |               |           |            |
| 51 |               |             |            |               |               | 1             | 1       | 1            |            |               |           | 1          |
| 52 |               | 1           |            |               |               |               |         |              |            |               |           |            |
| 53 |               | 1           |            |               |               |               |         |              |            |               |           |            |
| 54 |               |             |            |               |               |               |         |              | 1          | 1             |           |            |
| 55 |               |             | 1          | 1             | 1             | 1             |         |              | 1          | 1             |           |            |
| 56 |               |             | 1          | 1             | 1             | 1             |         |              |            |               |           |            |
| 57 |               |             |            |               |               |               |         |              |            |               |           | 1          |
| 58 |               |             |            |               |               |               |         |              | 1          | 1             |           |            |
| 59 |               |             |            |               |               |               |         |              | 1          |               | 1         |            |
| 60 |               |             |            |               |               |               | 1       | 1            |            |               |           |            |
| 61 |               |             |            |               |               |               | 1       |              |            | 1             |           | 1          |
| 62 |               |             |            |               |               |               |         |              |            |               | 1         | 1          |
| 63 |               |             |            |               |               |               | 1       | 1            |            | 1             |           | 1          |
| 64 |               |             |            |               |               |               |         |              | 1          |               |           |            |
| 65 |               |             |            |               |               |               |         |              |            |               | 1         | 1          |
| 66 |               |             |            |               |               |               |         |              |            |               | 1         |            |
| 67 |               |             |            |               |               |               |         |              | 1          | 1             |           |            |

Table S2. *Cont.*

|     | phiC<br>D6356 | phiCD3<br>8-2 | PhiMM<br>P04 | phiCDH<br>M13 | phiCDH<br>M11 | phiCDH<br>M14 | phi<br>C2 | phiCDH<br>M1 | PhiCD<br>119 | phiCDH<br>M19 | phiCD<br>27 | PhiMM<br>P02 |
|-----|---------------|---------------|--------------|---------------|---------------|---------------|-----------|--------------|--------------|---------------|-------------|--------------|
| 68  | 1             |               |              |               |               |               |           |              |              |               |             |              |
| 69  |               |               |              |               |               |               |           |              | 1            | 1             |             |              |
| 70  |               |               |              |               |               |               |           |              |              |               |             | 1            |
| 71  |               |               |              |               |               |               | 1         | 1            |              |               |             |              |
| 72  |               |               |              |               |               |               | 1         | 1            | 1            | 1             |             | 1            |
| 73  |               |               |              |               |               |               |           | 1            |              |               |             |              |
| 74  | 1             |               |              |               |               |               |           |              |              |               |             |              |
| 75  | 1             |               |              |               |               |               |           |              |              |               |             |              |
| 76  |               |               |              |               |               |               | 1         |              |              |               |             |              |
| 77  |               |               |              |               |               |               |           |              |              |               | 1           |              |
| 78  |               |               | 1            | 1             | 1             | 1             | 1         | 1            |              | 1             | 1           | 1            |
| 79  |               |               |              |               |               |               | 1         |              |              |               | 1           |              |
| 80  |               |               |              |               |               |               | 1         |              | 1            |               | 1           | 1            |
| 81  |               | 1             |              |               |               |               |           |              |              |               |             |              |
| 82  |               |               |              |               |               |               |           |              | 1            |               | 1           |              |
| 83  |               |               |              |               |               |               |           |              |              |               | 1           | 1            |
| 84  | 1             |               | 1            |               |               |               |           |              |              |               |             |              |
| 85  |               | 1             |              | 1             | 1             | 1             |           |              |              |               |             |              |
| 86  |               |               |              |               |               |               |           |              | 1            |               |             |              |
| 87  |               |               |              |               |               |               |           |              | 1            |               |             |              |
| 88  | 1             | 1             |              |               |               |               |           |              |              |               |             |              |
| 89  |               |               |              |               |               |               |           | 1            |              |               |             |              |
| 90  |               | 1             |              |               |               |               |           |              |              |               |             |              |
| 91  |               |               |              |               |               |               |           | 1            |              |               |             |              |
| 92  |               |               | 1            | 1             | 1             | 1             |           |              |              |               |             |              |
| 93  |               |               |              |               |               |               |           |              |              |               | 1           |              |
| 94  |               |               |              |               |               |               |           | 1            |              |               |             |              |
| 95  |               |               |              |               |               |               |           |              |              | 1             |             |              |
| 96  |               |               |              |               |               |               |           | 1            |              |               | 1           | 1            |
| 97  |               |               |              |               |               |               |           |              |              |               | 1           |              |
| 98  |               |               |              |               |               |               |           |              |              | 1             |             |              |
| 99  |               |               |              |               |               |               |           |              | 1            | 1             |             |              |
| 100 |               |               |              |               |               |               |           |              |              |               |             | 1            |
| 101 |               |               | 1            | 1             | 1             | 1             |           |              |              |               |             |              |
| 102 |               | 1             |              |               |               |               |           |              |              |               |             |              |
| 103 |               |               |              |               |               |               |           | 1            | 1            | 1             |             |              |
| 104 |               |               |              | 1             | 1             | 1             |           |              |              |               |             |              |
| 105 |               | 1             |              |               |               |               |           |              |              |               |             |              |
| 106 |               | 1             |              |               |               |               |           |              |              |               |             |              |
| 107 | 1             |               |              |               |               |               |           |              |              |               |             |              |
| 108 |               |               |              |               |               |               |           |              | 1            |               |             |              |
| 109 |               |               |              |               | 1             |               |           |              |              |               |             |              |

Table S2. *Cont.*

|     | phiC<br>D6356 | φCD3<br>8-2 | ΦMM<br>P04 | phiCDH<br>M13 | phiCDH<br>M11 | phiCDH<br>M14 | φ<br>C2 | phiCDH<br>M1 | ΦCD<br>119 | phiCDH<br>M19 | φCD<br>27 | ΦMM<br>P02 |
|-----|---------------|-------------|------------|---------------|---------------|---------------|---------|--------------|------------|---------------|-----------|------------|
| 110 |               |             |            |               |               |               | 1       | 1            |            |               | 1         | 1          |
| 111 |               |             |            |               |               |               | 1       | 1            |            |               |           |            |
| 112 |               |             |            |               |               |               |         |              | 1          |               |           |            |
| 113 |               |             |            |               |               |               |         |              | 1          |               |           |            |
| 114 | 1             |             |            |               |               |               |         |              |            |               |           |            |
| 115 |               |             |            |               |               |               |         |              |            |               | 1         | 1          |
| 116 |               |             |            |               |               |               |         | 1            |            |               |           |            |
| 117 |               |             |            |               |               |               |         |              | 1          |               |           |            |
| 118 | 1             |             |            |               |               |               |         |              |            |               |           |            |
| 119 |               |             |            |               |               |               | 1       | 1            |            |               |           |            |
| 120 |               | 1           |            |               |               |               |         |              |            |               |           |            |
| 121 |               |             | 1          | 1             | 1             | 1             |         |              |            | 1             |           |            |
| 122 | 1             |             |            |               |               |               |         |              |            |               |           |            |
| 123 |               |             |            | 1             | 1             | 1             |         |              |            |               |           |            |
| 124 |               |             |            |               |               |               | 1       |              |            |               |           |            |
| 125 |               |             |            |               |               |               |         |              | 1          | 1             |           |            |
| 126 |               |             |            |               |               |               |         |              |            |               |           | 1          |
| 127 |               |             |            |               |               |               |         |              | 1          |               |           |            |
| 128 | 1             |             |            |               |               |               |         |              |            |               |           |            |
| 129 |               |             | 1          | 1             | 1             | 1             |         |              | 1          | 1             |           |            |
| 130 |               |             |            |               |               |               | 1       | 1            |            |               |           |            |
| 131 |               |             |            |               |               |               |         |              |            |               | 1         |            |
| 132 |               |             |            |               |               |               | 1       |              | 1          | 1             |           |            |
| 133 | 1             |             |            |               |               |               |         |              |            |               |           |            |
| 134 |               |             |            |               |               |               | 1       |              | 1          | 1             | 1         | 1          |
| 135 |               | 1           | 1          | 1             |               | 1             |         |              |            |               |           |            |
| 136 |               | 1           |            |               |               |               |         |              |            |               |           |            |
| 137 |               |             |            |               |               | 1             |         |              |            |               |           |            |
| 138 |               |             |            |               |               |               |         |              | 1          | 1             |           |            |
| 139 | 1             |             |            |               |               |               |         |              |            |               |           |            |
| 140 |               |             |            |               |               |               |         |              | 1          |               |           |            |
| 141 |               |             |            |               |               |               |         |              |            | 1             |           |            |
| 142 |               |             |            |               |               |               |         |              |            | 1             |           |            |
| 143 |               | 1           |            |               |               |               |         |              |            |               |           |            |
| 144 |               | 1           |            |               |               |               |         |              |            |               |           |            |
| 145 |               | 1           |            |               |               |               |         |              |            |               |           |            |
| 146 |               |             |            |               |               |               |         |              |            |               |           | 1          |
| 147 |               |             |            |               |               |               | 1       | 1            |            |               |           |            |
| 148 |               |             |            |               |               |               |         |              |            | 1             | 1         |            |
| 149 |               |             |            |               |               |               | 1       |              |            |               |           |            |
| 150 | 1             |             |            |               |               |               |         |              |            |               |           |            |
| 151 |               |             |            |               |               |               |         |              |            | 1             |           |            |

Table S2. *Cont.*

|     | phiC<br>D6356 | φCD3<br>8-2 | ΦMM<br>P04 | phiCDH<br>M13 | phiCDH<br>M11 | phiCDH<br>M14 | φ<br>C2 | phiCDH<br>M1 | ΦCD<br>119 | phiCDH<br>M19 | φCD<br>27 | ΦMM<br>P02 |
|-----|---------------|-------------|------------|---------------|---------------|---------------|---------|--------------|------------|---------------|-----------|------------|
| 152 | 1             |             |            |               |               |               |         |              |            |               |           |            |
| 153 |               |             |            |               |               |               | 1       |              |            |               |           |            |
| 154 |               |             | 1          |               |               |               |         |              |            |               |           |            |
| 155 |               |             |            |               |               |               | 1       |              |            |               |           |            |
| 156 |               |             |            |               |               |               | 1       |              |            | 1             | 1         |            |
| 157 |               |             |            |               |               |               | 1       |              |            | 1             | 1         |            |
| 158 |               |             |            |               |               |               | 1       | 1            |            | 1             | 1         | 1          |
| 159 |               |             |            |               |               |               |         |              |            |               |           | 1          |
| 160 |               | 1           |            |               |               |               |         |              |            |               |           |            |
| 161 | 1             |             |            |               |               |               |         |              |            |               |           |            |
| 162 |               |             |            |               |               |               |         |              |            |               |           | 1          |
| 163 |               |             |            |               |               |               |         |              | 1          |               |           |            |
| 164 |               |             |            |               |               |               |         |              |            |               |           | 1          |
| 165 |               |             |            |               |               |               |         |              |            |               |           | 1          |
| 166 |               |             |            |               |               |               | 1       | 1            | 1          | 1             |           |            |
| 167 |               |             |            |               |               |               | 1       |              |            |               |           |            |
| 168 |               |             |            |               |               |               |         |              |            |               | 1         |            |
| 169 |               |             |            |               |               |               |         |              |            |               | 1         |            |
| 170 |               |             |            |               |               |               |         |              |            |               | 1         |            |
| 171 |               |             |            |               |               |               |         |              | 1          | 1             |           |            |
| 172 |               | 1           |            |               |               |               |         |              |            |               |           |            |
| 173 |               |             |            |               |               |               | 1       | 1            |            |               |           |            |
| 174 |               |             |            |               |               |               |         |              | 1          |               |           |            |
| 175 |               |             | 1          | 1             |               | 1             |         |              |            |               |           |            |
| 176 | 1             |             |            |               |               |               |         |              |            |               |           |            |
| 177 |               |             |            |               |               |               |         |              |            |               | 1         | 1          |
| 178 |               |             | 1          | 1             | 1             | 1             |         |              |            |               |           |            |
| 179 |               |             |            |               |               |               |         |              |            |               | 1         |            |
| 180 |               |             |            |               |               |               |         |              |            | 1             |           |            |
| 181 |               |             |            |               |               |               |         |              |            | 1             |           |            |
| 182 |               |             |            |               |               |               |         |              | 1          | 1             |           |            |
| 183 |               |             |            | 1             | 1             | 1             |         |              |            |               |           |            |
| 184 |               |             |            | 1             | 1             | 1             |         |              |            |               |           |            |
| 185 |               |             |            |               |               |               |         |              |            |               | 1         | 1          |
| 186 | 1             |             |            |               |               |               |         |              |            |               |           |            |
| 187 |               |             |            |               |               |               |         |              |            |               |           | 1          |
| 188 |               |             |            |               |               |               | 1       |              |            |               |           |            |
| 189 | 1             |             |            |               |               |               |         |              |            |               |           |            |
| 190 |               |             |            |               |               |               | 1       | 1            |            |               |           |            |
| 191 |               |             |            |               |               |               | 1       | 1            |            |               |           |            |
| 192 |               | 1           |            |               |               |               |         |              |            |               |           |            |
| 193 |               |             | 1          | 1             | 1             | 1             |         |              |            |               |           |            |

Table S2. *Cont.*

|     | phiC<br>D6356 | φCD3<br>8-2 | ΦMM<br>P04 | phiCDH<br>M13 | phiCDH<br>M11 | phiCDH<br>M14 | φ<br>C2 | phiCDH<br>M1 | ΦCD<br>119 | phiCDH<br>M19 | φCD<br>27 | ΦMM<br>P02 |
|-----|---------------|-------------|------------|---------------|---------------|---------------|---------|--------------|------------|---------------|-----------|------------|
| 194 |               |             |            |               |               |               |         |              | 1          | 1             |           |            |
| 195 |               |             |            |               |               |               |         |              | 1          |               |           |            |
| 196 |               |             | 1          |               |               |               |         | 1            |            | 1             |           |            |
| 197 |               | 1           |            |               |               |               |         |              |            |               |           |            |
| 198 |               |             | 1          | 1             | 1             | 1             |         |              | 1          | 1             |           |            |
| 199 |               | 1           |            |               |               |               |         |              |            |               |           |            |
| 200 |               |             |            |               |               |               | 1       | 1            |            |               |           |            |
| 201 |               |             |            |               |               |               |         |              |            |               | 1         |            |
| 202 |               |             | 1          | 1             | 1             | 1             |         |              |            |               |           |            |
| 203 |               |             |            |               |               |               |         | 1            |            |               |           |            |
| 204 |               |             |            |               |               |               | 1       |              | 1          | 1             | 1         | 1          |
| 205 |               |             | 1          | 1             | 1             | 1             |         |              |            |               |           |            |
| 206 |               |             |            |               |               |               |         |              |            |               |           | 1          |
| 207 |               |             |            |               |               |               |         |              |            |               |           | 1          |
| 208 |               |             |            |               |               |               | 1       | 1            |            |               |           |            |
| 209 |               |             |            |               |               |               |         |              | 1          | 1             |           |            |
| 210 |               |             |            |               |               |               |         |              | 1          |               |           |            |
| 211 |               |             |            |               |               |               | 1       | 1            | 1          | 1             | 1         |            |
| 212 | 1             |             |            |               |               |               |         |              |            |               |           |            |
| 213 |               | 1           |            |               |               |               |         |              |            |               |           |            |
| 214 |               | 1           |            | 1             | 1             | 1             |         |              |            |               |           |            |
| 215 |               |             |            |               |               |               |         |              | 1          | 1             |           |            |
| 216 |               |             |            |               |               |               |         |              |            |               |           | 1          |
| 217 |               |             |            |               |               |               |         |              | 1          |               |           |            |
| 218 |               |             |            |               |               |               |         |              | 1          | 1             |           |            |
| 219 |               |             |            |               |               |               | 1       |              |            |               |           |            |
| 220 |               |             |            |               |               |               |         | 1            |            |               |           | 1          |
| 221 | 1             |             | 1          |               |               |               |         |              |            |               |           |            |
| 222 |               |             |            |               |               |               |         |              | 1          |               |           |            |
| 223 |               |             |            |               |               |               |         | 1            |            | 1             |           |            |
| 224 |               |             |            | 1             |               |               |         |              |            |               |           |            |
| 225 |               |             |            |               |               |               | 1       |              |            | 1             | 1         |            |
| 226 |               |             |            |               |               |               |         |              |            |               | 1         | 1          |
| 227 |               |             |            |               |               |               | 1       |              |            |               |           |            |
| 228 |               |             |            |               |               |               | 1       |              |            |               |           | 1          |
| 229 |               |             |            |               |               |               |         |              |            |               | 1         |            |
| 230 |               |             |            |               |               |               |         | 1            | 1          |               |           |            |
| 231 |               |             |            |               |               |               |         |              |            |               | 1         | 1          |
| 232 |               | 1           |            | 1             | 1             | 1             |         |              |            |               |           | 1          |
| 233 |               |             |            |               |               |               | 1       |              | 1          |               | 1         |            |
| 234 | 1             |             |            |               |               |               |         |              |            |               |           |            |
| 235 |               |             |            |               |               |               |         |              | 1          |               |           |            |

Table S2. *Cont.*

|     | phiC<br>D6356 | φCD3<br>8-2 | ΦMM<br>P04 | phiCDH<br>M13 | phiCDH<br>M11 | phiCDH<br>M14 | φ<br>C2 | phiCDH<br>M1 | ΦCD<br>119 | phiCDH<br>M19 | φCD<br>27 | ΦMM<br>P02 |
|-----|---------------|-------------|------------|---------------|---------------|---------------|---------|--------------|------------|---------------|-----------|------------|
| 236 | 1             |             |            |               |               |               |         |              |            |               |           |            |
| 237 |               |             |            |               |               |               |         |              | 1          | 1             |           |            |
| 238 |               |             |            |               |               |               |         |              |            |               | 1         | 1          |
| 239 |               | 1           |            |               |               |               |         |              |            |               |           |            |
| 240 | 1             |             |            |               |               |               |         |              |            |               |           |            |
| 241 |               |             |            |               |               |               |         | 1            |            |               |           |            |
| 242 |               | 1           |            |               |               |               |         |              |            |               |           |            |
| 243 |               |             |            |               |               |               | 1       |              |            | 1             | 1         |            |
| 244 |               |             |            |               |               |               |         | 1            | 1          | 1             |           |            |
| 245 |               |             |            |               |               |               |         | 1            |            | 1             |           |            |
| 246 |               |             |            |               |               |               |         |              |            |               |           | 1          |
| 247 |               |             | 1          | 1             | 1             | 1             |         |              |            |               |           |            |
| 248 |               |             |            |               |               |               |         |              | 1          | 1             |           |            |
| 249 |               |             |            |               |               |               |         |              |            | 1             |           |            |
| 250 |               | 1           |            |               |               |               |         |              |            |               |           |            |
| 251 |               | 1           |            |               |               |               |         |              |            |               |           |            |
| 252 |               |             |            |               |               |               | 1       | 1            |            |               |           |            |
| 253 |               |             |            |               |               |               | 1       |              |            |               |           |            |
| 254 | 1             |             |            |               |               |               |         |              |            |               |           |            |
| 255 |               |             | 1          | 1             | 1             | 1             |         |              |            |               |           |            |
| 256 |               |             |            |               |               |               |         | 1            |            | 1             | 1         |            |
| 257 |               |             |            |               |               |               |         |              |            |               | 1         | 1          |
| 258 |               |             | 1          | 1             | 1             | 1             |         |              |            |               |           |            |
| 259 |               |             |            |               |               |               | 1       |              | 1          | 1             | 1         |            |
| 260 | 1             |             |            |               |               |               |         |              |            |               |           |            |
| 261 |               |             |            |               |               |               |         | 1            |            |               |           |            |
| 262 |               |             |            |               |               |               |         |              | 1          |               |           |            |
| 263 |               | 1           |            |               |               |               |         |              |            |               |           |            |
| 264 |               | 1           |            | 1             | 1             | 1             |         |              |            |               |           |            |
| 265 | 1             |             |            |               |               |               |         |              |            |               |           |            |
| 266 |               |             |            |               |               |               |         |              |            |               | 1         |            |
| 267 |               |             | 1          | 1             | 1             | 1             |         |              | 1          | 1             |           |            |
| 268 |               |             |            |               |               |               |         |              | 1          |               |           |            |
| 269 |               |             |            |               |               |               | 1       |              |            |               |           |            |
| 270 | 1             |             |            |               |               |               |         |              |            |               |           |            |
| 271 |               |             |            |               |               |               |         | 1            |            | 1             |           |            |
| 272 |               |             |            |               |               |               |         |              | 1          |               |           |            |
| 273 |               |             |            |               |               |               |         |              |            | 1             |           | 1          |
| 274 |               |             |            |               |               |               | 1       |              |            | 1             |           |            |
| 275 |               |             |            |               |               |               |         |              |            |               | 1         |            |
| 276 |               |             |            |               |               |               | 1       |              |            |               |           |            |

Table S2. *Cont.*

|     | phiC<br>D6356 | φCD3<br>8-2 | ΦMM<br>P04 | phiCDH<br>M13 | phiCDH<br>M11 | phiCDH<br>M14 | φ<br>C2 | phiCDH<br>M1 | ΦCD<br>119 | phiCDH<br>M19 | φCD<br>27 | ΦMM<br>P02 |
|-----|---------------|-------------|------------|---------------|---------------|---------------|---------|--------------|------------|---------------|-----------|------------|
| 277 |               |             |            | 1             | 1             | 1             |         |              |            |               |           |            |
| 278 |               | 1           |            |               |               |               |         |              |            |               |           |            |
| 279 |               |             |            |               |               |               |         | 1            |            | 1             |           |            |
| 280 |               |             |            |               |               |               |         |              | 1          | 1             |           |            |
| 281 | 1             |             |            |               |               |               | 1       |              |            |               |           |            |
| 282 |               |             |            |               |               |               |         |              | 1          |               |           |            |
| 283 |               |             |            |               |               |               |         |              |            | 1             | 1         | 1          |
| 284 | 1             |             |            |               |               |               |         |              |            |               |           |            |
| 285 |               |             |            |               |               |               |         |              | 1          |               |           |            |
| 286 | 1             |             | 1          |               |               |               |         | 1            |            | 1             | 1         | 1          |
| 287 | 1             |             |            |               |               |               |         |              |            |               |           |            |
| 288 |               |             | 1          | 1             |               | 1             |         |              |            |               |           |            |
| 289 | 1             |             |            |               |               |               |         |              |            |               |           |            |
| 290 |               |             |            |               |               |               |         | 1            | 1          |               |           |            |
| 291 |               |             | 1          |               |               |               |         |              |            |               |           |            |
| 292 |               |             | 1          |               | 1             | 1             |         |              |            |               |           |            |
| 293 | 1             |             |            |               |               |               |         |              |            |               |           |            |
| 294 |               | 1           |            |               |               |               |         |              |            |               |           |            |
| 295 |               |             |            |               |               |               |         |              | 1          |               |           |            |
| 296 |               |             |            |               |               |               |         |              | 1          |               |           |            |
| 297 |               |             |            |               |               |               |         |              |            |               |           | 1          |
| 298 |               | 1           |            | 1             | 1             | 1             |         |              |            |               |           |            |
| 299 | 1             |             |            |               |               |               |         |              |            |               |           |            |
| 300 |               |             |            |               |               |               |         | 1            |            |               |           |            |
| 301 |               |             | 1          |               |               |               |         |              |            |               |           |            |
| 302 |               |             | 1          |               |               |               |         |              |            |               |           |            |
| 303 |               |             |            |               |               |               |         | 1            |            |               |           |            |
| 304 |               |             |            |               |               |               |         |              | 1          |               |           |            |
| 305 |               |             |            |               |               |               |         |              |            |               |           | 1          |
| 306 | 1             |             |            |               |               |               |         |              |            |               |           |            |
| 307 | 1             |             |            | 1             | 1             |               |         |              |            |               |           |            |
| 308 |               |             |            |               |               | 1             |         |              |            |               |           |            |
| 309 | 1             | 1           |            |               |               |               |         |              |            |               |           |            |
| 310 | 1             |             | 1          | 1             | 1             |               |         |              |            |               |           |            |
| 311 |               |             |            |               |               |               | 1       | 1            |            |               |           |            |
| 312 | 1             |             |            |               |               |               |         |              |            |               |           |            |
| 313 |               |             |            | 1             | 1             | 1             | 1       |              | 1          |               | 1         | 1          |
| 314 | 1             |             | 1          |               |               |               |         |              |            |               |           |            |
| 315 |               |             |            |               |               |               | 1       | 1            |            |               |           |            |
| 316 |               |             |            |               |               |               |         | 1            | 1          |               |           |            |
| 317 |               |             |            |               |               |               |         |              |            |               |           | 1          |
| 318 |               |             |            |               |               |               |         |              | 1          |               |           |            |



Table S2. *Cont.*

|     | phiC<br>D6356 | φCD3<br>8-2 | ΦMM<br>P04 | phiCDH<br>M13 | phiCDH<br>M11 | phiCDH<br>M14 | φ<br>C2 | phiCDH<br>M1 | ΦCD<br>119 | phiCDH<br>M19 | φCD<br>27 | ΦMM<br>P02 |
|-----|---------------|-------------|------------|---------------|---------------|---------------|---------|--------------|------------|---------------|-----------|------------|
| 319 |               |             |            |               |               |               |         |              | 1          |               |           |            |
| 320 |               |             |            |               |               |               |         | 1            |            |               |           |            |
| 321 |               |             |            |               | 1             |               |         |              |            |               |           |            |
| 322 |               |             |            |               |               |               |         |              | 1          | 1             |           |            |
| 323 |               |             |            |               |               |               |         |              | 1          |               |           |            |
| 324 |               |             |            |               |               |               |         |              |            |               |           | 1          |
| 325 |               | 1           |            |               |               |               |         |              |            |               |           |            |
| 326 |               |             |            |               |               |               |         | 1            |            |               |           |            |
| 327 |               |             |            |               |               |               |         |              | 1          |               |           |            |
| 328 |               |             | 1          |               |               |               |         |              |            |               |           |            |
| 329 |               |             |            |               |               |               |         | 1            |            |               |           |            |
| 330 |               |             |            |               |               |               | 1       |              |            |               |           |            |
| 331 |               |             |            |               |               |               | 1       |              |            |               |           |            |
| 332 |               |             |            |               |               |               |         |              |            | 1             |           |            |
| 333 |               |             |            | 1             | 1             | 1             | 1       |              | 1          |               | 1         | 1          |
| 334 |               |             |            |               |               |               |         |              | 1          |               |           |            |
| 335 |               |             |            |               |               |               |         |              |            |               |           | 1          |
| 336 |               |             |            |               |               |               |         |              |            | 1             |           |            |
| 337 |               |             |            |               |               |               | 1       |              |            |               |           |            |
| 338 |               |             |            |               |               |               | 1       |              |            |               |           |            |
| 339 |               |             |            |               |               |               | 1       |              |            |               |           |            |
| 340 |               |             |            |               |               |               |         |              |            |               | 1         |            |
| 341 |               |             |            |               |               |               | 1       | 1            |            | 1             |           | 1          |
| 342 |               |             |            | 1             |               |               |         |              |            |               |           |            |
| 343 |               |             |            |               |               |               |         |              |            | 1             |           |            |
| 344 |               |             |            |               |               |               |         |              | 1          |               |           | 1          |
| 345 | 1             |             |            |               |               |               |         |              |            |               |           |            |
| 346 |               |             |            |               |               |               |         | 1            |            |               |           |            |
| 347 |               |             |            |               |               |               |         |              |            |               |           | 1          |
| 348 |               |             |            |               |               |               | 1       |              |            |               |           |            |
| 349 | 1             |             |            |               |               |               |         |              |            |               |           |            |
| 350 |               |             |            | 1             |               | 1             |         |              |            |               |           |            |
| 351 |               | 1           |            |               |               |               |         |              |            |               |           |            |
| 352 |               |             |            |               |               |               |         |              |            |               | 1         |            |
| 353 |               |             |            |               | 1             | 1             |         |              |            |               |           |            |
| 354 |               |             |            |               |               |               |         |              |            |               |           | 1          |
| 355 |               |             |            |               |               |               |         |              |            |               | 1         | 1          |
| 356 |               |             |            |               |               |               | 1       |              |            |               |           |            |
| 357 |               |             |            |               |               |               |         | 1            |            | 1             |           |            |
| 358 |               |             |            |               |               |               | 1       |              |            |               |           |            |
| 359 |               |             |            |               |               |               |         | 1            |            | 1             |           |            |
| 360 |               |             |            |               |               |               |         |              |            | 1             |           |            |



Table S2. *Cont.*

|     | phiC<br>D6356 | φCD3<br>8-2 | ΦMM<br>P04 | phiCDH<br>M13 | phiCDH<br>M11 | phiCDH<br>M14 | φ<br>C2 | phiCDH<br>M1 | ΦCD<br>119 | phiCDH<br>M19 | φCD<br>27 | ΦMM<br>P02 |
|-----|---------------|-------------|------------|---------------|---------------|---------------|---------|--------------|------------|---------------|-----------|------------|
| 403 |               |             | 1          | 1             | 1             | 1             |         |              |            |               |           |            |
| 404 |               |             |            |               |               |               | 1       |              |            |               |           |            |
| 405 | 1             |             |            |               |               |               |         |              |            |               |           |            |
| 406 |               |             |            |               |               |               |         |              |            |               |           | 1          |
| 407 | 1             | 1           | 1          |               |               |               |         |              |            |               |           |            |
| 408 |               |             | 1          |               |               |               |         |              |            |               |           |            |
| 409 |               |             |            |               |               |               | 1       |              |            |               |           | 1          |
| 410 |               |             |            |               |               |               |         |              |            |               | 1         |            |
| 411 | 1             |             |            | 1             | 1             |               |         |              |            |               |           |            |
| 412 |               |             |            |               |               |               | 1       |              |            |               |           |            |
| 413 |               |             |            |               |               |               |         | 1            |            |               |           | 1          |
| 414 |               |             |            |               |               |               |         | 1            |            |               |           |            |
| 415 |               |             |            |               |               |               |         |              |            | 1             |           |            |
| 416 |               |             |            |               |               |               |         |              |            |               | 1         | 1          |
| 417 | 1             |             |            |               |               |               |         |              |            | 1             | 1         | 1          |
| 418 |               |             |            |               |               |               |         | 1            |            |               |           |            |
| 419 |               |             |            |               |               |               |         |              |            | 1             |           |            |
| 420 |               |             |            |               |               |               | 1       |              |            | 1             | 1         |            |
| 421 |               |             |            |               |               |               |         |              |            |               |           | 1          |
| 422 |               |             |            |               |               |               |         |              |            |               | 1         |            |
| 423 |               | 1           | 1          |               |               |               |         |              |            |               |           |            |
| 424 |               |             |            |               |               |               |         | 1            |            |               |           |            |
| 425 |               |             |            |               |               |               |         | 1            |            |               | 1         |            |
| 426 |               |             |            |               |               |               |         | 1            |            |               |           | 1          |
| 427 |               |             |            |               | 1             |               |         |              |            |               |           |            |
| 428 |               |             |            |               |               |               |         |              |            | 1             |           |            |
| 429 |               |             |            |               | 1             |               |         |              |            |               |           |            |
| 430 |               | 1           |            |               |               |               |         |              |            |               |           |            |
| 431 |               |             | 1          |               |               |               |         |              |            |               |           |            |
| 432 |               |             |            |               |               |               |         | 1            |            |               | 1         |            |
| 433 |               |             |            |               |               |               |         | 1            |            |               |           |            |
| 434 |               | 1           |            |               |               |               |         |              |            |               |           |            |
| 435 |               | 1           | 1          | 1             |               |               |         |              |            |               |           |            |
| 436 |               | 1           |            |               |               |               |         |              |            |               |           |            |
| 437 |               |             |            |               |               | 1             |         |              |            |               |           |            |
| 438 |               |             |            |               |               |               |         |              |            | 1             |           | 1          |
| 439 |               |             | 1          |               |               |               |         |              |            |               |           |            |
| 440 |               |             | 1          |               |               |               |         |              |            |               |           |            |
| 441 |               |             |            |               |               |               |         |              |            |               |           | 1          |
| 442 |               |             |            |               |               | 1             |         |              |            |               |           |            |
| 443 |               |             |            |               | 1             |               |         |              |            |               |           |            |
| 444 |               |             |            |               |               |               | 1       |              |            |               |           |            |

**Table S3.** Protein clusters shared between all myoviruses with reference to  $\Phi$ CD119.

| PC  | ORF | Product |
|-----|-----|---------|
| 376 | 32  | unknown |

PC = Protein cluster.

**Table S4.** Protein clusters shared between all phiCDH119likevirus representatives;  $\Phi$ CD119, phiCDHM19,  $\varphi$ C2, phiCDHM1,  $\phi$ CD27 and  $\Phi$ MMP02.

| PC  | ORF | Product |
|-----|-----|---------|
| 166 | 73  | unknown |

PC = Protein cluster.

**Table S5.** Protein clusters shared between  $\varphi$ C2 and phiCDHM1 with protein clusters with reference to  $\varphi$ C2.

| PC  | ORF | Product              |
|-----|-----|----------------------|
| 7   | 20  | tape measure protein |
| 11  | 22  | cell wall hydrolase  |
| 25  | 3   | portal protein       |
| 36  | 13  | tail sheath protein  |
| 40  | 2   | TerL                 |
| 60  | 25  | unknown              |
| 71  | 7   | Mjr capsid           |
| 111 | 21  | LysM                 |
| 119 | 55  | Anti-repressor       |
| 130 | 26  | unknown              |
| 147 | 6   | scaffold protein     |
| 173 | 14  | core tail protein    |
| 190 | 16  | unknown              |
| 191 | 12  | unknown              |
| 200 | 11  | unknown              |
| 208 | 9   | unknown              |
| 252 | 10  | unknown              |
| 311 | 23  | unknown              |
| 315 | 15  | unknown              |

PC = Protein cluster.

**Table S6.** Protein clusters shared between  $\Phi$ CD119 and phiCDHM19 with to  $\Phi$ CD119 ORFs.

| PC  | ORF | Product          |
|-----|-----|------------------|
| 33  | 4   | portal           |
| 58  | 5   | head protein     |
| 125 | 6   | Unknown          |
| 138 | 8   | scaffold protein |
| 69  | 9   | capsid           |

**Table S6.** *Cont.*

| PC  | ORF | Product            |
|-----|-----|--------------------|
| 248 | 11  | Unknown            |
| 209 | 12  | unknown            |
| 182 | 13  | unknown            |
| 54  | 14  | XkdK-like protein  |
| 194 | 15  | XkdM-like protein  |
| 171 | 16  | XkdMN-like protein |
| 99  | 21  | unknown            |
| 322 | 22  | unknown            |
| 215 | 44  | unknown            |
| 218 | 45  | RepR               |
| 364 | 48  | unknown            |
| 237 | 56  | unknown            |
| 67  | 77  | unknown            |
| 280 | 25  | unknown            |

PC = Protein cluster.

**Table S7.** Protein clusters shared between  $\phi$ CD27 and  $\Phi$ MMP02 (LTMs) with reference to  $\phi$ CD27.

| PC  | ORF | Product                    |
|-----|-----|----------------------------|
| 23  | 3   | TerL                       |
| 26  | 13  | Unknown                    |
| 28  | 2   | TerS                       |
| 34  | 5   | Unknown                    |
| 62  | 4   | Head Morphological Protein |
| 65  | 19  | Unknown                    |
| 83  | 11  | Unknown                    |
| 115 | 18  | LysM                       |
| 177 | 21  | Unknown                    |
| 185 | 10  | Unknown                    |
| 226 | 6   | Unknown                    |
| 231 | 9   | Unknown                    |
| 238 | 20  | Unknown                    |
| 257 | 8   | Unknown                    |
| 355 | 12  | Unknown                    |
| 416 | 41  | Unknown                    |

PC = protein cluster.

**Table S8.** Protein clusters shared between proposed  $\Phi$ MMP04likevirus group with reference to  $\Phi$ MMP04.

| PC | ORF | Product              |
|----|-----|----------------------|
| 13 | 14  | tape measure protein |
| 18 | 2   | Terminase            |

**Table S8.** *Cont.*

| PC  | ORF | Product              |
|-----|-----|----------------------|
| 38  | 5   | mjr capsid           |
| 47  | 3   | portal               |
| 56  | 10  | tail sheath protein  |
| 92  | 22  | tail fiber           |
| 101 | 4   | clp protease         |
| 178 | 8   | unknown              |
| 193 | 39  | unknown              |
| 202 | 9   | unknown              |
| 205 | 12  | XkdN-related protein |
| 247 | 41  | Unknown              |
| 255 | 36  | Unknown              |
| 258 | 7   | head_tail adaptor    |
| 391 | 13  | Unknown              |
| 403 | 40  | Unknown              |

PC = Protein cluster.

**Table S9.** Protein clusters shared between the two siphoviruses  $\phi$ CD38-2 and  $\phi$ iCD6356 with reference to  $\phi$ iCD6356 ORFs.

| PC  | ORF | Product   |
|-----|-----|-----------|
| 88  | 28  | endolysin |
| 309 | 27  | holin     |
| 386 | 47  | unknown   |
| 393 | 49  | unknown   |

PC = Protein cluster.

© 2015 by the authors; licensee MDPI, Basel, Switzerland. This article is an open access article distributed under the terms and conditions of the Creative Commons Attribution license (<http://creativecommons.org/licenses/by/4.0/>).
